# Supplementary material for: Normal tension glaucoma-like degeneration of the visual system in aged marmosets
Source: PubMed Central journal article supplement (PMC6795850; doi:10.1038/s41598-019-51281-y), 2019-10-16

## Supplementary Information for

### **Normal tension glaucoma-like degeneration of the visual system in aged marmosets**

**Takahiko Noro<sup>1,2,3</sup>, Kazuhiko Namekata<sup>1</sup>, Atsuko Kimura<sup>1</sup>, Yuriko Azuchi<sup>1</sup>, Nanako Hashimoto<sup>4</sup>, Keiko Moriya-Ito<sup>4,5</sup>, Yuji Komaki<sup>2</sup>, Chia-Ying Lee<sup>2</sup>, Norio Okahara<sup>2</sup>, Xiaoli Guo<sup>1</sup>, Chikako Harada<sup>1</sup>, Euido Kim<sup>1,3</sup>, Tadashi Nakano<sup>3</sup>, Hiroshi Tsuneoka<sup>3</sup>, Takashi Inoue<sup>2</sup>, Erika Sasaki<sup>2</sup>, Hironobu Tokuno<sup>5</sup> and Takayuki Harada<sup>1</sup>**

<sup>1</sup>Visual Research Project, Tokyo Metropolitan Institute of Medical Science, Tokyo, Japan.

<sup>2</sup>Central Institute for Experimental Animals, Kawasaki, Japan.

<sup>3</sup>Department of Ophthalmology, The Jikei University School of Medicine, Tokyo, Japan.

<sup>4</sup>Center for Basic Technology Research, Tokyo Metropolitan Institute of Medical Science, Tokyo, Japan.

<sup>5</sup>Laboratory of Brain Structure, Tokyo Metropolitan Institute of Medical Science, Tokyo, Japan.

\*Corresponding author: **Takayuki Harada, M.D. Ph.D.**

Visual Research Project, Tokyo Metropolitan Institute of Medical Science

2-1-6 Kamikitazawa, Setagaya-ku, Tokyo 156-8506, Japan.

E-mail: [harada-tk@igakuken.or.jp](mailto:harada-tk@igakuken.or.jp)

**Supplementary Table 1. List of marmosets examined in this study**

| ID       | Sex | Age (years) | Body Weight (g) | IOP  |      | Axial Length |      | Ophthalmoscopy | OCT | mfERG | Doppler Imaging | Blood Test | CSF | MRI |
|----------|-----|-------------|-----------------|------|------|--------------|------|----------------|-----|-------|-----------------|------------|-----|-----|
|          |     |             |                 | R    | L    | R            | L    |                |     |       |                 |            |     |     |
| 1        | F   | 8           | 310             | 17   | 22   | 8.9          | 9    | ○              | ○   | ○     | ○               | ○          |     |     |
| 2        | F   | 8           | 358             | 22   | 23   |              |      | ○              |     |       |                 |            | ○   |     |
| 3        | F   | 9           | 368             | 23   | 25   | 9.6          | 8.8  | ○              | ○   | ○     | ○               | ○          |     |     |
| 4        | M   | 9           | 362             | 20   | 19   |              |      | ○              |     |       |                 |            |     |     |
| 5        | M   | 10          | 368             | 17   | 18   | 9.5          | 9.7  | ○              | ○   | ○     |                 |            |     |     |
| 6        | F   | 10          | 369             | 15   | 14   | 9.1          | 9.5  | ○              | ○   | ○     |                 |            |     |     |
| 7        | F   | 10          | 354             | 21   | 21   |              |      | ○              |     |       |                 |            | ○   |     |
| 8        | M   | 10          | 377             | 22   | 22   |              |      | ○              |     |       |                 |            |     |     |
| 9        | F   | 10          | 348             | 19   | 17   | 9.2          | 9.8  | ○              | ○   | ○     | ○               | ○          | ○   |     |
| 10       | M   | 10          | 354             | 21   | 20   | 9.8          | 10   | ○              | ○   | ○     | ○               |            |     | ○   |
| 11       | F   | 10          | 359             | 20   | 19   |              |      | ○              |     |       |                 |            |     |     |
| 12       | F   | 10          | 331             | 26   | —    |              |      | ○              |     |       |                 |            |     |     |
| 13       | F   | 10          | 442             | 25   | 30   |              |      | ○              |     |       |                 |            |     |     |
| 14       | M   | 10          | 345             | 23   | 26   |              |      | ○              |     |       |                 |            |     |     |
| 15       | F   | 10          | 399             | 19   | 23   |              |      | ○              |     |       |                 |            |     |     |
| 16       | F   | 10          | 389             | 17   | 16   |              |      | ○              |     |       |                 |            |     |     |
| 17       | M   | 11          | 301             | 16   | 20   | 10.2         | 10.3 | ○              | ○   | ○     | ○               | ○          | ○   |     |
| 18       | M   | 11          | 343             | 21   | 20   |              |      | ○              |     |       |                 |            |     |     |
| 19       | M   | 11          | 326             | 20   | 25   | 10.2         | 10   | ○              | ○   | ○     | ○               | ○          | ○   | ○   |
| 20       | F   | 11          | 367             | 20   | 19   | 9.6          | 9.7  | ○              | ○   | ○     | ○               | ○          | ○   | ○   |
| 21       | F   | 11          | 369             | 22   | 21   | 10           | 9.7  | ○              |     | ○     | ○               |            |     |     |
| 22       | F   | 11          | 334             | 27   | 30   |              |      | ○              |     |       |                 |            |     |     |
| 23       | M   | 12          | 333             | 22   | 25   | 10.1         | 9.9  | ○              | ○   | ○     |                 |            |     |     |
| 24       | F   | 12          | 329             | 30   | 29   |              |      | ○              |     |       |                 |            |     |     |
| 25       | F   | 13          | 358             | 24   | 22   | 10           | 10.4 | ○              | ○   | ○     | ○               | ○          |     | ○   |
| 26       | M   | 13          | 308             | 20   | 20   | 10.1         | 10.1 | ○              | ○   | ○     | ○               | ○          |     |     |
| 27       | M   | 13          | 334             | 22   | 19   |              |      | ○              |     |       |                 |            |     |     |
| 28       | F   | 14          | 480             | 24   | 31   |              |      | ○              |     |       |                 |            |     |     |
| 29       | M   | 14          | 360             | 17   | 25   |              |      | ○              |     |       |                 |            |     |     |
| 30       | M   | 15          | 332             | 19   | 17   | 10.1         | 10.6 | ○              | ○   | ○     | ○               |            |     |     |
| 31       | M   | 15          | 272             | 23   | 20   |              |      | ○              |     |       |                 |            |     |     |
| 32       | F   | 16          | 372             | 24   | 23   | 10.2         | 10.7 | ○              | ○   | ○     | ○               |            |     |     |
| Average  |     |             | 11.2            | 355  | 21.2 | 22.0         | 9.8  | 9.9            |     |       |                 |            |     |     |
| SE       |     |             | 0.4             | 6.8  | 0.6  | 0.8          | 0.1  | 0.1            |     |       |                 |            |     |     |
| Glaucoma |     |             |                 |      |      |              |      |                |     |       |                 |            |     |     |
| 33       | M   | 12          | 347             | 21   | 23   | 10.3         | 10.4 | ○              | ○   | ○     | ○               | ○          | ○   | ○   |
| 34       | F   | 12          | 434             | 17   | 17   | 9            | 9.1  | ○              | ○   | ○     | ○               | ○          | ○   |     |
| 35       | F   | 13          | 298             | 22   | 24   | 10.1         | 10.2 | ○              | ○   | ○     | ○               | ○          | ○   | ○   |
| 36       | F   | 13          | 366             | 18   | 19   |              |      | ○              | ○   | ○     |                 |            |     | ○   |
| Average  |     |             | 12.5            | 361  | 19.4 | 20.7         | 9.8  | 9.9            |     |       |                 |            |     |     |
| SE       |     |             | 0.3             | 28.2 | 1.2  | 1.6          | 0.4  | 0.4            |     |       |                 |            |     |     |

**Supplementary Table 2. Primer sequences used for PCR**

| Gene                                                    | Exon                                                     | Sequences                                                       |
|---------------------------------------------------------|----------------------------------------------------------|-----------------------------------------------------------------|
| <i>MYOC</i><br>GenBank accession number<br>XM_008985025 | 1                                                        | F: TCTTGCTGGCAATGTGAAGGCAACC<br>R: TGCTATGAGCCAGATCACCTGCTGA    |
|                                                         | 2                                                        | F: TTCAAGCGATTCTCCTGCCTCCA<br>R: ATTCTTCATGACCAGTAAGTGGG        |
|                                                         | 3                                                        | F: AATGGTCACAGTCTGTGTTT<br>R: GTCAGATGGTGACCATGCACATCCT         |
| <i>OPTN</i><br>GenBank accession number<br>XM_002750043 | 2                                                        | F: GATCATCATGAGGTCATAACCCTTGT<br>R: ATGGCATTACCCGAAGGCCTGGGAT   |
|                                                         | 3                                                        | F: AATGAAGTCCACTCTTCCTGGTGTG<br>R: GGCTCCTTAGCAAACGCATCCAGTG    |
|                                                         | 4                                                        | F: CCCAGAGCTCTGGATTACAGGTGTA<br>R: TGAGCCGAGATCGCATCATTGCACT    |
|                                                         | 5                                                        | F: GAAGGTTCCCTTGCGTTACATGTCAC<br>R: GCAGGCCATTACACTTGAGTTCCTG   |
|                                                         | 6                                                        | F: CACCAGTGGTGTATGAGCATTCCAC<br>R: ACCGCTGCTCGGGAAGACAATTTGG    |
|                                                         | 7                                                        | F: ACAGTTGGCTTAAAGGTAGGCCTTC<br>R: GAATTCGGTGGCTGGACTACTCTCA    |
|                                                         | 8                                                        | F: CTGTGATCTCTGAACCTGGAGTAAG<br>R: CAGCTCTGTAGAGCTCTCACTTAGG    |
|                                                         | 9                                                        | F: TGCATCACTGCATGAGAAGCGCCTT<br>R: ATCTGAGAAGTCTCCTAGGACTCCT    |
|                                                         | 10                                                       | F: CCACTTGAGTGTTTCAGAAGGTTGGG<br>R: TCCACCTCTTCCTGAAGTCAGTGGA   |
|                                                         | 11                                                       | F: GTGCTGAGATTCCAGGCATAAGCCA<br>R: GCCTTGCTCAGCTATGGTTCTGGAA    |
|                                                         | 12                                                       | F: GTAGAGAATCCACAGTCTTCTAGGT<br>R: CTACAGCTAATGCTGATGTGAGCTC    |
|                                                         | 13                                                       | F: CAGGGTTGTAGAACGTCATATGTAG<br>R: TTGCACTCCAGCCTGGGTAACAAGA    |
|                                                         | 14                                                       | F: TGCAGTGAGCCAAGATCGCACCCT<br>R: AGTATCTGGGATAACAGGCACGTGC     |
|                                                         | <i>WDR36</i><br>GenBank accession number<br>XM_008991713 | 8                                                               |
| 11                                                      |                                                          | F: GACTTCAGAATACCATGTCAGTGAG<br>R: AGATCAGCATGTACCTGGAGTTACT    |
| 13                                                      |                                                          | F: GCCTCTCATCAGGAACTGTAGATGT<br>R: CATGGTCCTTATGATACAACACTGCAGT |

**Supplementary Movies** (Please use Adobe Reader to display the movies)

**Movie 1.**

A representative movie showing the optic disc cupping of an aged marmoset (aged 110 months; No. 3 in Table 1) captured by disc map 3D scans with SD-OCT.

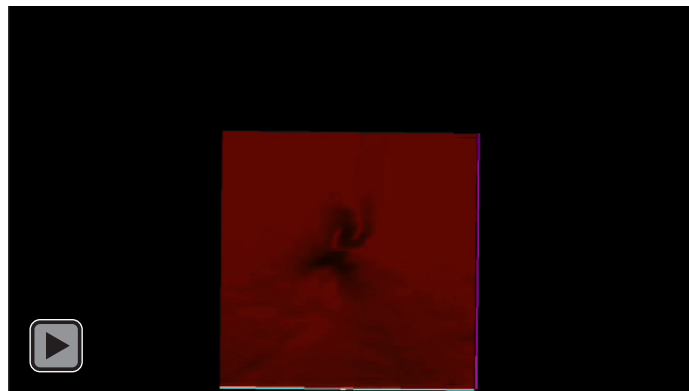

**Movie 2.**

A representative movie showing the optic disc cupping of the glaucomatous marmoset (aged 157 months; No. 34 in Table 1, Left eye of Year 1 in Figure 5) captured by disc map 3D scans with SD-OCT.

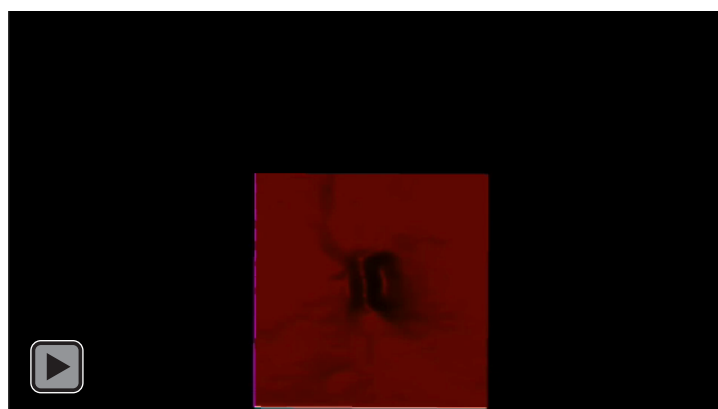

Supplement: 41598_2019_51281_MOESM1_ESM.pdf [file 41598_2019_51281_MOESM1_ESM.pdf]
